# Supplementary material
Source: PubMed Central journal article supplement (PMC8519289)
Supplement: iai.00396-21-s0002.pdf [file iai.00396-21-s0002.pdf]

# Fig. S1

## A

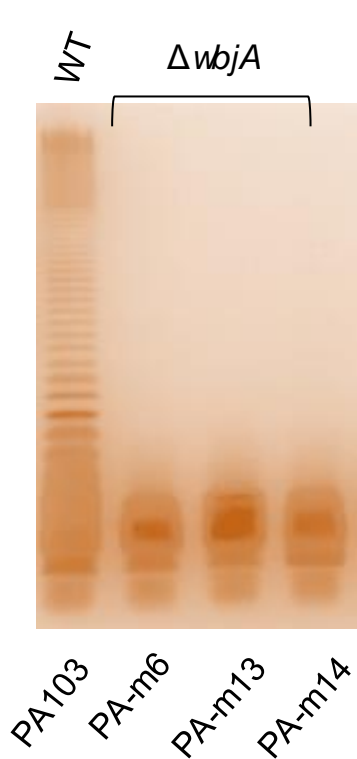

## B

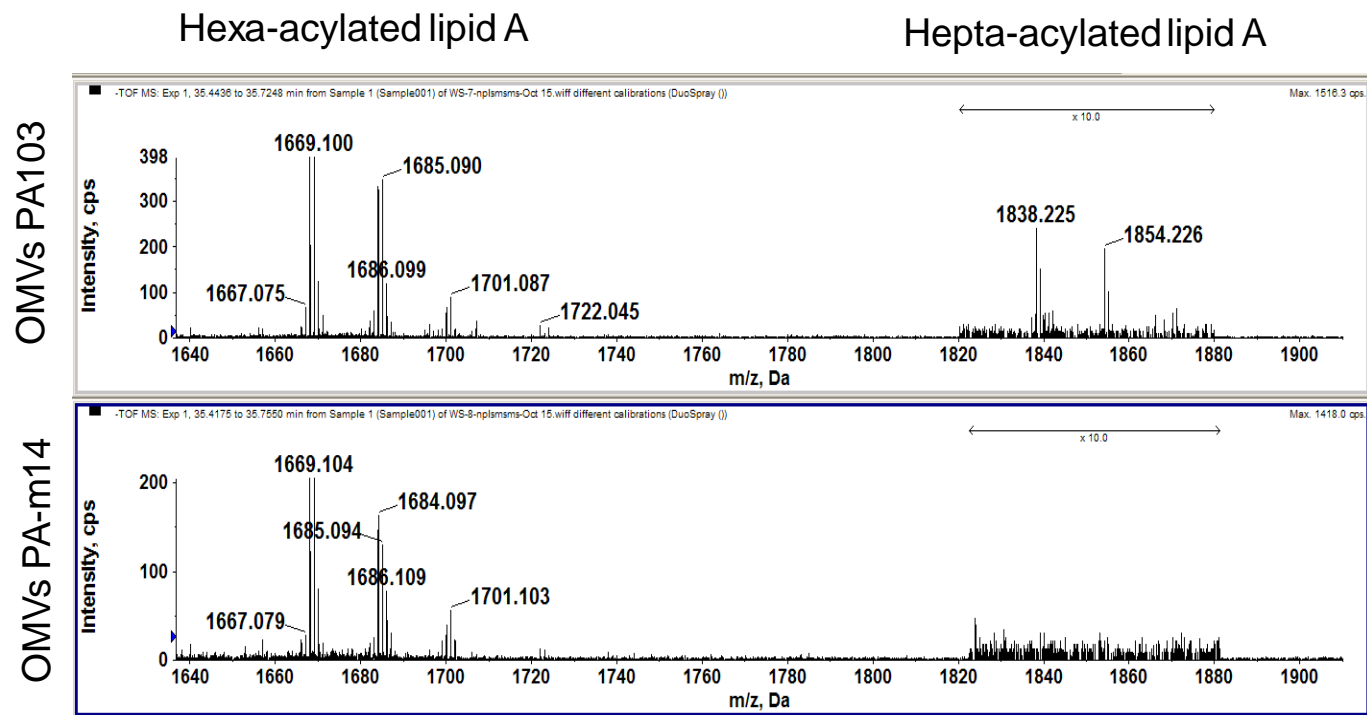

## C

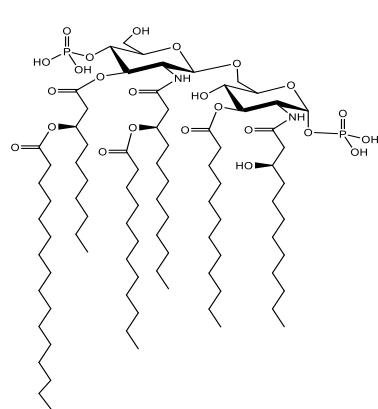

Chemical Formula:  $C_{86}H_{162}N_2O_{24}P_2$   
Exact Mass: 1669.099

m/z 1669.10

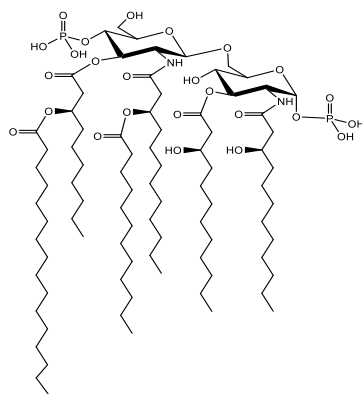

Chemical Formula:  $C_{86}H_{162}N_2O_{25}P_2$   
Exact Mass: 1685.094

m/z 1685.09

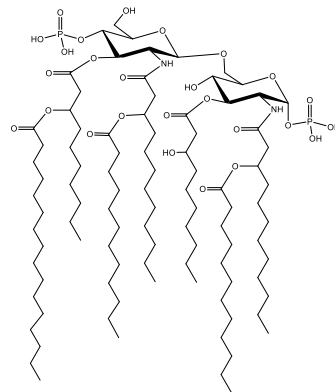

Chemical Formula:  $C_{96}H_{180}N_2O_{26}P_2$   
Exact Mass: 1839.230

m/z 1838.225

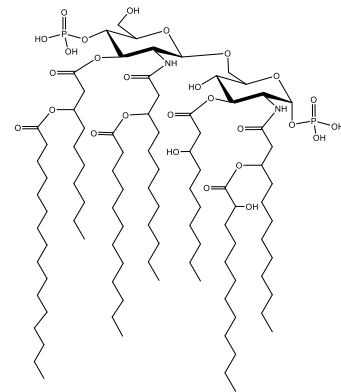

Chemical Formula:  $C_{96}H_{180}N_2O_{27}P_2$   
Exact Mass: 1855.225

m/z 1854.226

**Fig. S2**

**A**

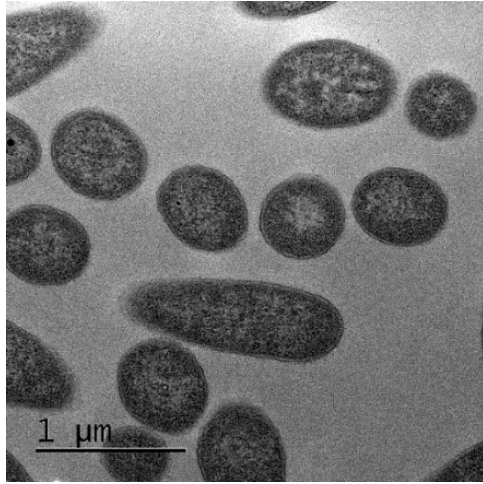

PA103 strain

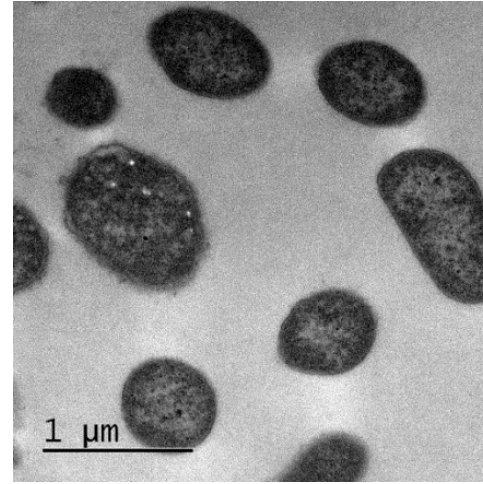

PA-m14 strain

**B**

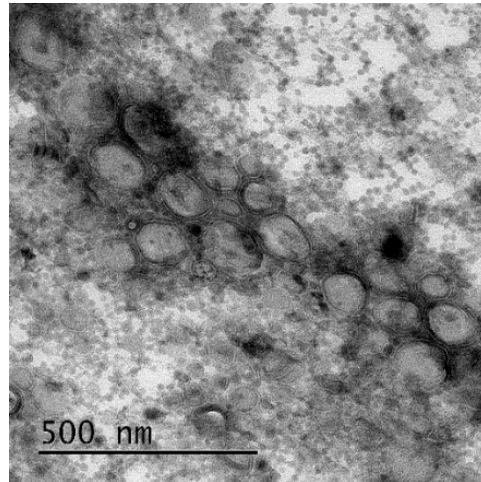

OMVs from PA103

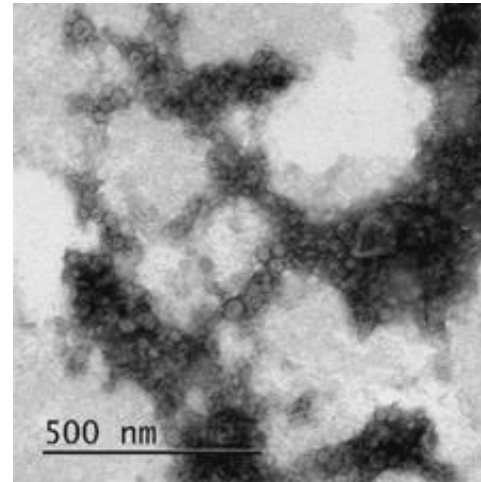

OMVs from PA-m14

**Fig. S3****A**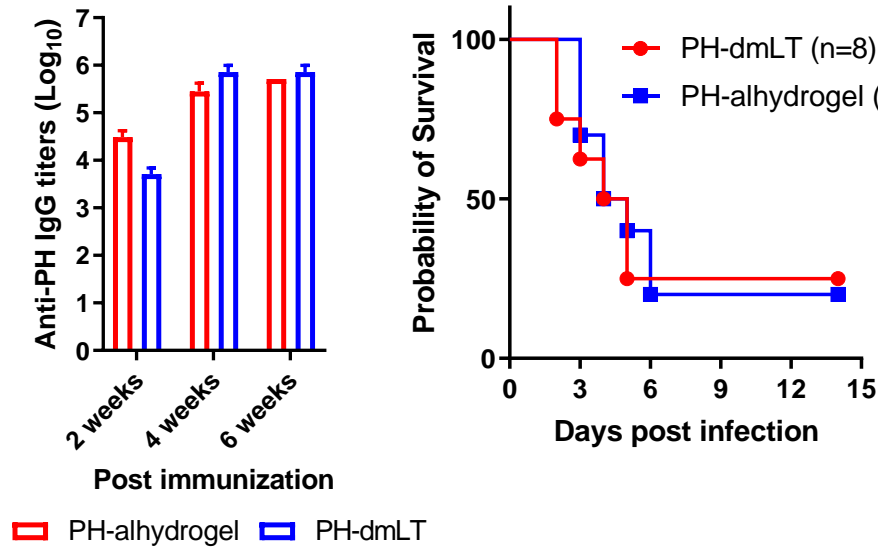**B**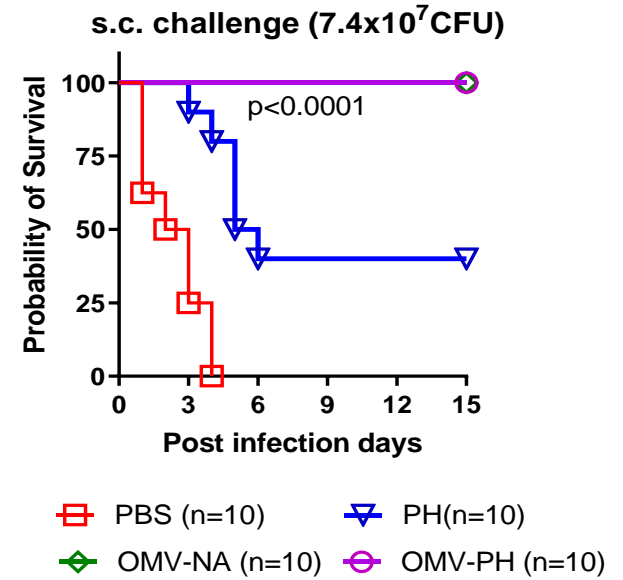**C**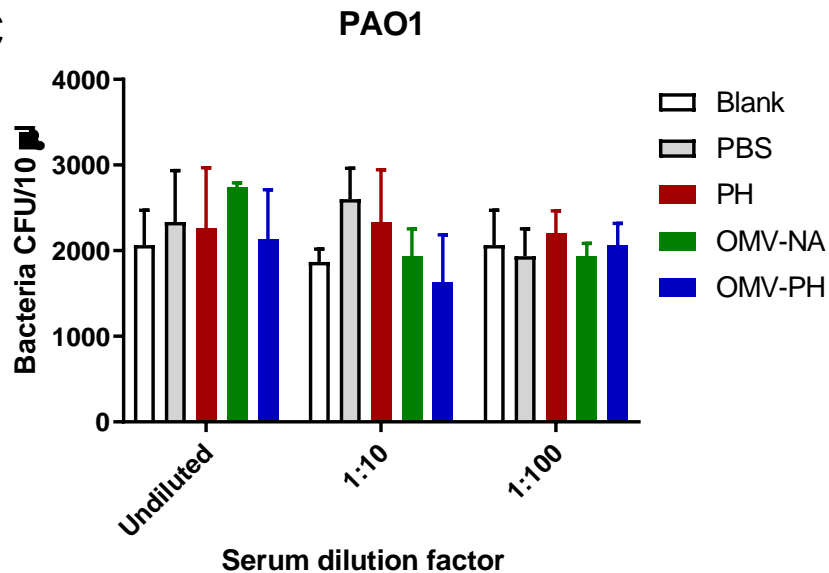**D**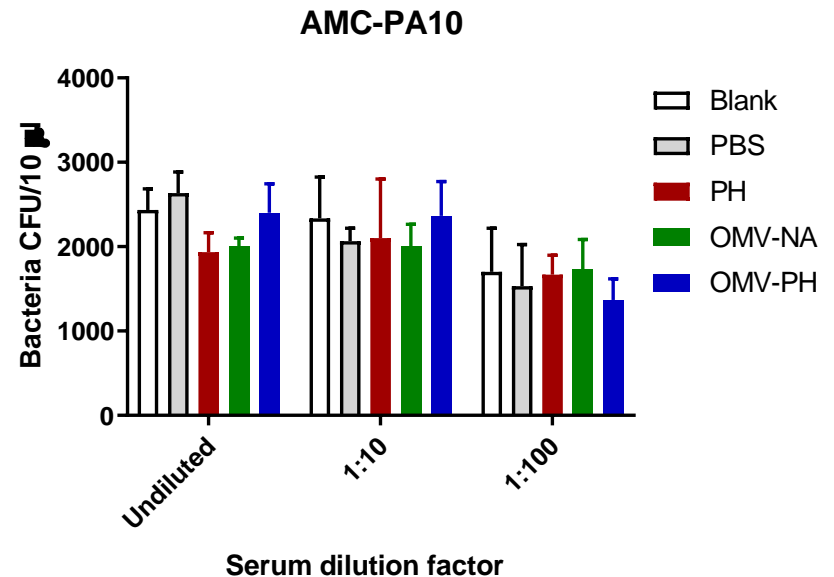

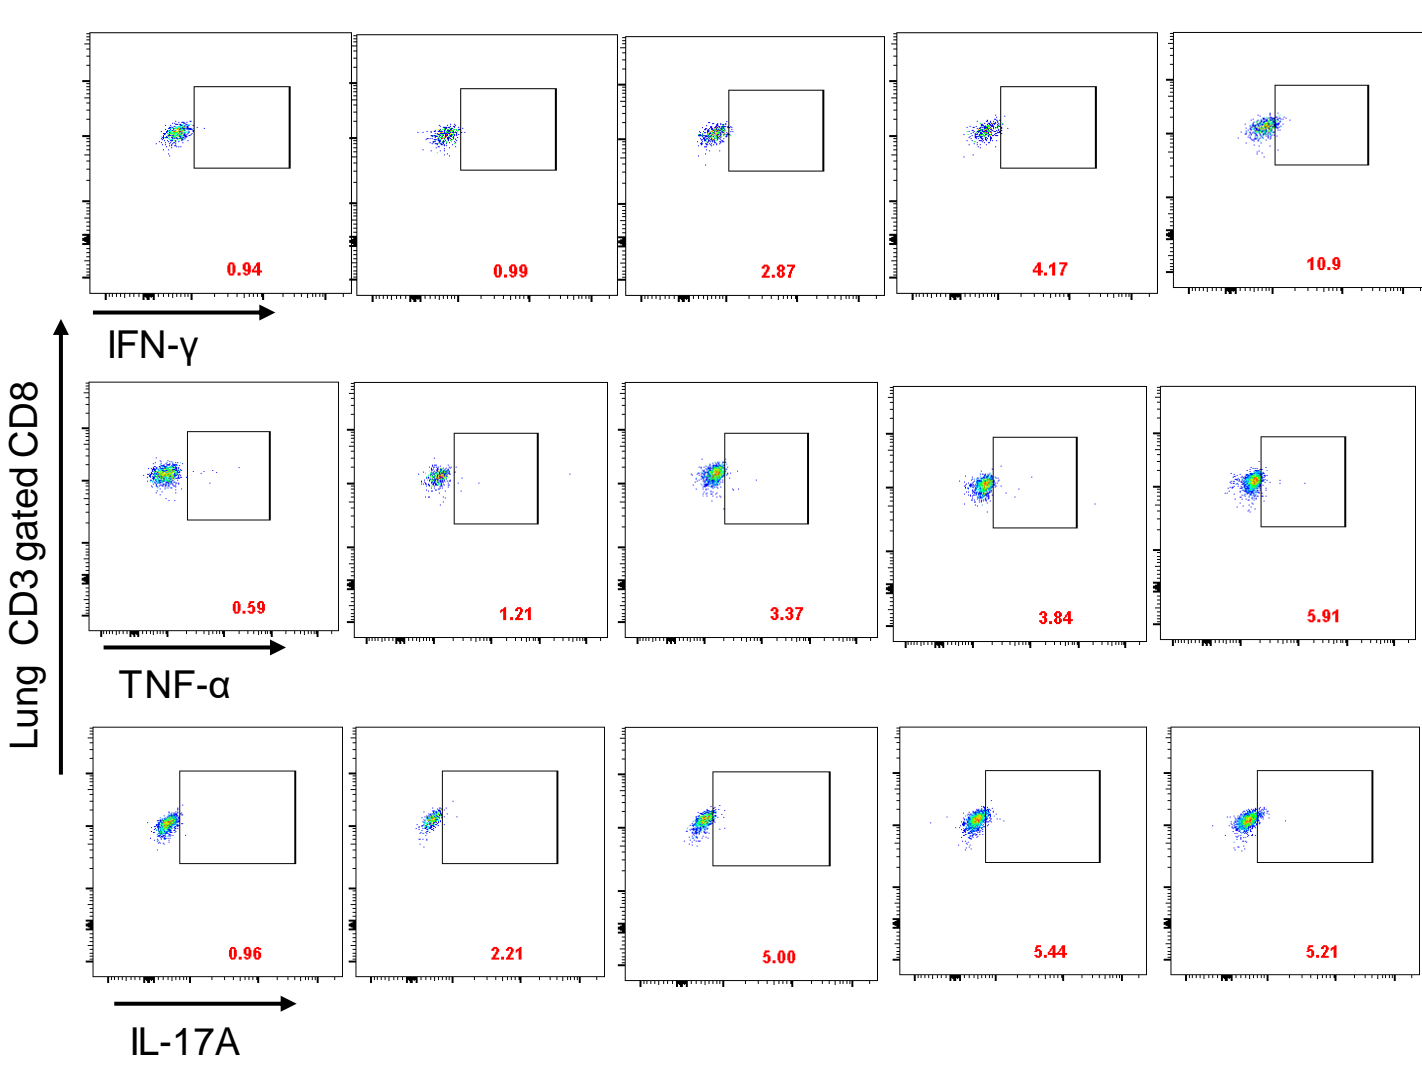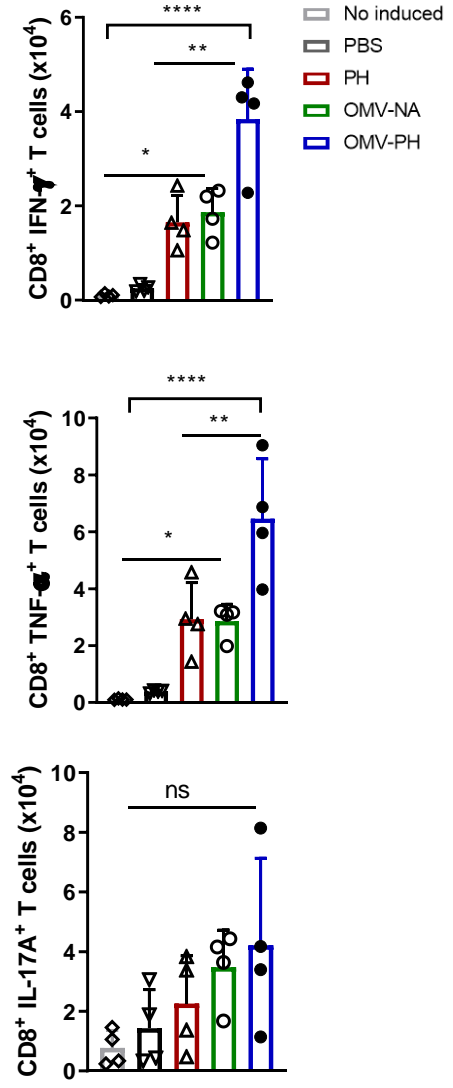

Fig. S4

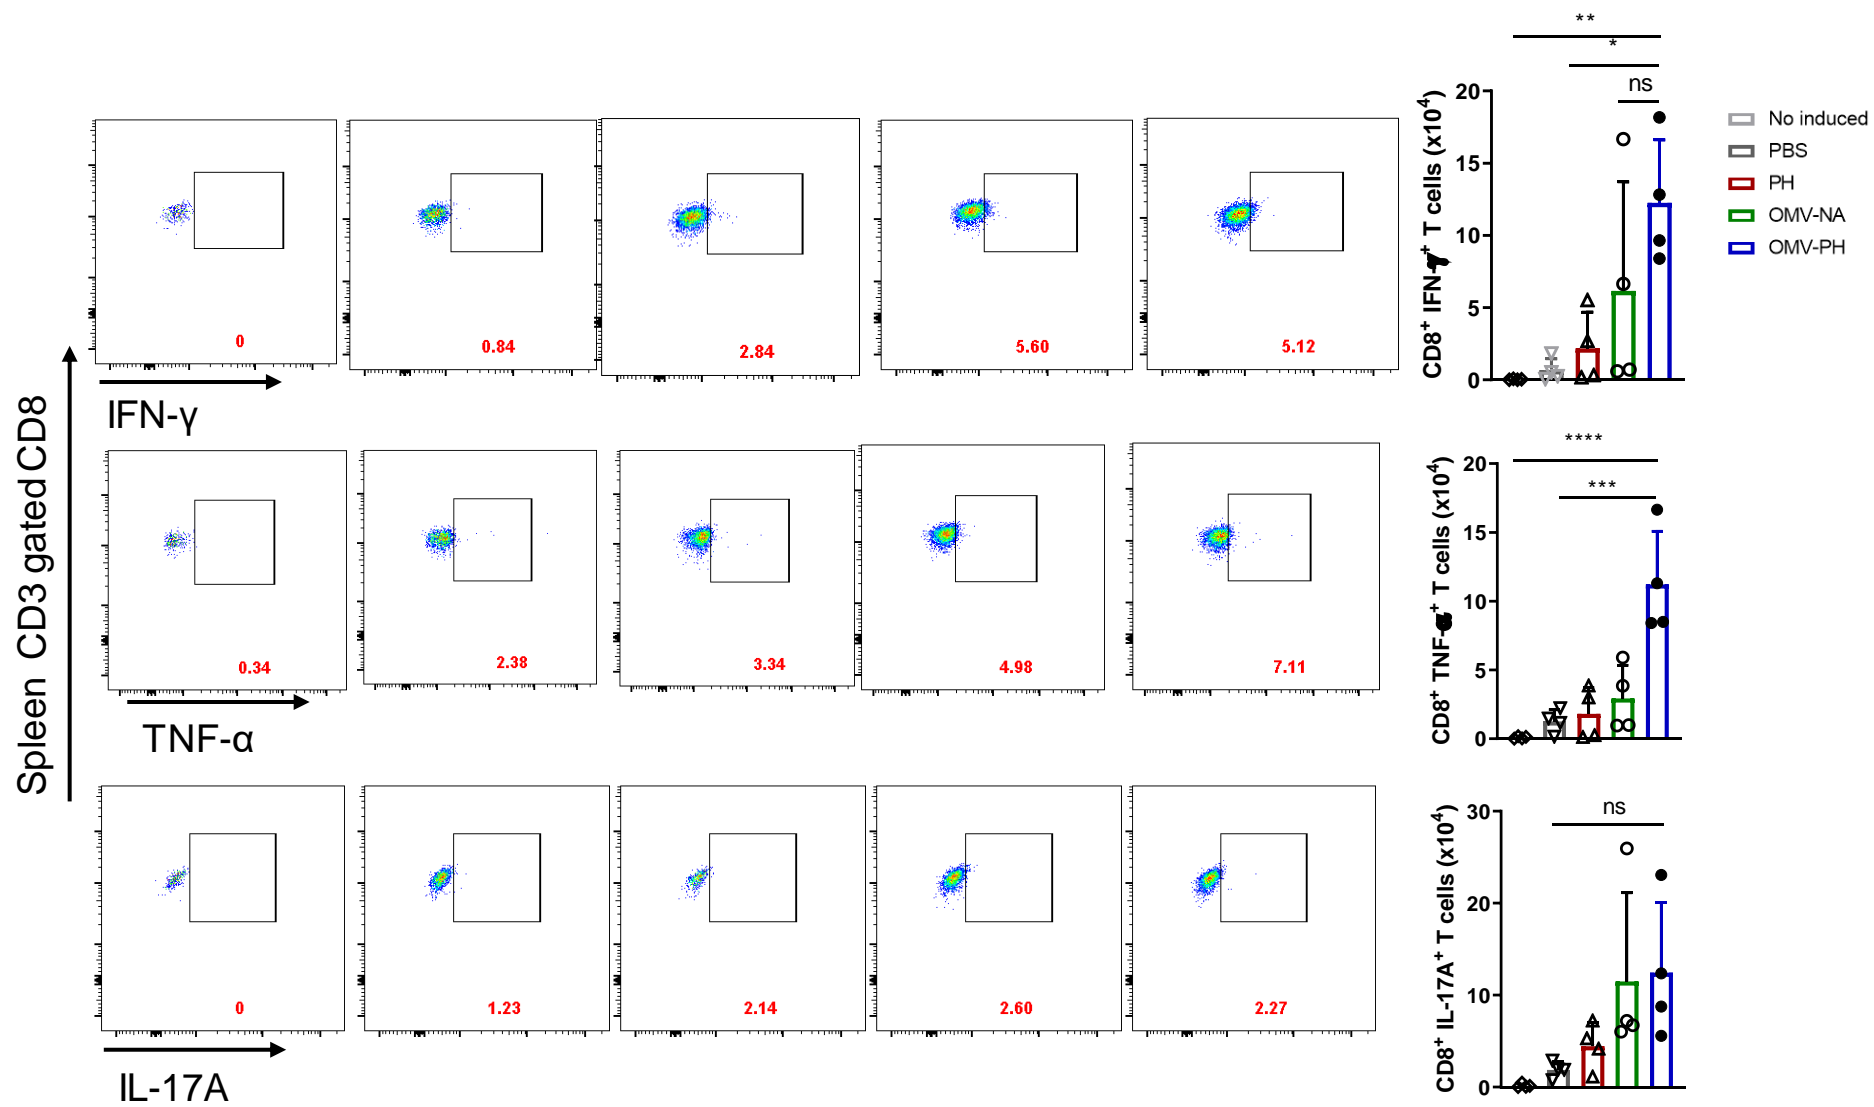

**Fig. S5**
